# Supplementary material
Source: PubMed Central journal article supplement (PMC4937730)
Supplement: ajcr0006-1231-f10.pdf [file ajcr0006-1231-f10.pdf]

# Biomarkers for polyamine transport in pancreatic cancers

## Supporting information

Supporting information is available from the corresponding author (OP) and includes siRNA experiment controls, and overall expression of ATP13A3 and Cav-1 in human cancers, the ATP13A3 over- and Cav-1 under-expression mRNA pattern in common cancers, extensive data tables obtained from our analysis of human cancer databases showing the inverse correlations between ATP13A3 and Cav-1 and the complete ATP13A3-Cav1 mRNA expression correlation data used for **Figure 9**.

**Table S1.** ATP13A3 and CAV1 mRNA expression in human cancer datasets

| Gene    | Expression     |              | Column 1 shows the average MAS5.0-normalized data for mRNA expression, with their SEM, calculated over 130 independent cancer datasets representing most different cancer types in R2 (17,363 samples in total). Column 2 shows the percentage of samples with a present call indicative of significant mRNA expression. For comparison: <i>GAPDH</i> and <i>ACTB</i> household mRNA expression in these datasets ranges between 5,000 and 10,000. |
|---------|----------------|--------------|----------------------------------------------------------------------------------------------------------------------------------------------------------------------------------------------------------------------------------------------------------------------------------------------------------------------------------------------------------------------------------------------------------------------------------------------------|
|         | Mean           | Present call |                                                                                                                                                                                                                                                                                                                                                                                                                                                    |
| ATP13A3 | 478.1 (± 20.3) | 99.6%        |                                                                                                                                                                                                                                                                                                                                                                                                                                                    |
| CAV1    | 888.4 (± 83.7) | 76.8%        |                                                                                                                                                                                                                                                                                                                                                                                                                                                    |

**Table S1** shows the widespread, medium-level expression of both ATP13A3 and CAV1. Both genes are usually expressed in cancer cells. Affymetrix mRNA arrays have a built-in weighing algorithm for perfectly homologous vs. non-perfect mismatched probes for each gene to distinguish between significant ("present call") and absent/background ("absent call") expression. The above information allows the definition of significant expression for each sample. The inverse correlations we found are, therefore, not based on just a few signals, and are likely robust. For these mRNA arrays and this normalization procedure, expression values are almost linear and allow the following rule-of-thumb: 50-100: low expression. Visible with a very good antibody on Western blot; 250-2500: good expression. Levels for most genes, Visible with any reasonable antibody; > 2500: high expression. Usually reserved for household genes. While the mean expression of ATP13A3 mRNA expression is lower than CAV1 mRNA expression, the ATP13A3 expression is almost invariant, while that of CAV1 is more variable and is absent in almost 25% of samples. As shown below in **Table S2**, it is the inverse correlation that is most striking, not the actual expression levels.

**Table S2.** ATP13A3 over- and CAV1 under-expression mRNA pattern in common cancers<sup>a</sup>

| Type          | Subtype                             | SETS | High ATP13A3 | Low CAV1 |
|---------------|-------------------------------------|------|--------------|----------|
| Adrenal Gland | Adenoma, cortex                     | 1    | 1            | 1        |
| Bladder       | Carcinoma, urothelial infiltrating  | 3    | 2            | 2        |
| Breast        | Carcinoma, ductal                   | 4    | 2            | 4        |
| Breast        | Carcinoma, ductal and lobular mixed | 2    | 1            | 2        |
| Breast        | Carcinoma, ductal invasive          | 6    | 3            | 6        |
| Breast        | Carcinoma, invasive                 | 3    | 2            | 3        |
| Breast        | Carcinoma, lobular invasive         | 1    | 1            | 1        |
| Breast        | Carcinoma, male                     | 1    | 1            | 1        |
| Cervix        | Carcinoma, squamous cell (SCC)      | 3    | 3            | 3        |
| Colon         | Adenocarcinoma, cecum               | 2    | 2            | 2        |
| Colon         | Adenocarcinoma, mucinous            | 2    | 2            | 1        |
| Colon         | Adenocarcinoma, NOS                 | 2    | 2            | 2        |
| Colon         | Adenocarcinoma, rectal              | 3    | 3            | 2        |
| Colon         | Adenocarcinoma, rectal mucinous     | 2    | 2            | 1        |
| Colon         | Adenocarcinoma, rectosigmoid        | 2    | 2            | 1        |
| Colon         | Carcinoma, colorectal               | 2    | 2            | 1        |
| Colon         | Carcinoma, NOS                      | 1    | 1            | 1        |
| Germ cell     | Seminoma                            | 2    | 2            | 1        |
| Liver         | Dysplasia, liver cell               | 1    | 1            | 1        |
| Lung          | Carcinoma, squamous cell (SCC)      | 6    | 6            | 5        |
| Lung          | Mesothelioma, pleural malignant     | 1    | 1            | 1        |
| Lymphoma      | Mantle cell                         | 1    | 1            | 1        |
| Ovary         | Adenocarcinoma, clear cell          | 2    | 1            | 2        |
| Ovary         | Adenocarcinoma, endometrioid        | 2    | 2            | 2        |
| Ovary         | Adenocarcinoma, mucinous            | 2    | 2            | 2        |
| Ovary         | Adenocarcinoma, serous              | 4    | 2            | 4        |

## Biomarkers for polyamine transport in pancreatic cancers

|          |                                     |    |    |    |
|----------|-------------------------------------|----|----|----|
| Ovary    | Carcinoma, NOS                      | 1  | 1  | 1  |
| Ovary    | Carcinoma, serous surface papillary | 1  | 1  | 1  |
| Ovary    | Cystadenocarcinoma, serous          | 1  | 1  | 1  |
| Prostate | Adenocarcinoma                      | 1  | 1  | 2  |
| Prostate | Carcinoma, NOS                      | 14 | 10 | 11 |
| Prostate | Neoplasia, intraepithelial          | 1  | 1  | 1  |
| Skin     | Melanoma, cutaneous                 | 1  | 1  | 1  |
| Stomach  | Cancer, NOS                         | 2  | 2  | 1  |
| Vulva    | Neoplasia, intraepithelial          | 1  | 1  | 1  |

<sup>a</sup>Tumor types and subtypes are indicated in the first two columns. Column 3 shows the total amount of sets and column 4-5 show the number of datasets that have significant *ATP13A3* tumor mRNA over-expression and *CAV1* under-expression, respectively, per tumor subtype. Text is on a green background if  $\geq 50\%$  of the datasets for that tumor subtype showed the inverse *ATP13A3/CAV1* expression pattern. Data from Oncomine, complete data in [Supplemental Table](#).

**Table S3.** Complete *ATP13A3* and *CAV1* mRNA expression used for [Table S2](#) and [Figure 9A-D](#)

| Type          | Subtype                                | <i>ATP13A3</i> |         | <i>CAV1</i> |         | Set (size)              | N   | N   |
|---------------|----------------------------------------|----------------|---------|-------------|---------|-------------------------|-----|-----|
|               |                                        | P              | Fold    | P           | Fold    |                         |     |     |
| Adrenal Gland | Adenoma, cortex                        | 4.70E-02       | 1.111   | 3.00E-03    | -1.214  | Giordano 2 (65)         | 22  | 10  |
| Adrenal Gland | Carcinoma, cortex                      |                |         | 1.90E-02    | 2.894   | Giordano (19)           | 9   | 3   |
| Adrenal Gland | Carcinoma, cortex                      | 5.00E-03       | 1.199   | 2.40E-02    | 1.129   | Giordano 2 (65)         | 29  | 10  |
| Bladder       | Cancer, superficial                    |                |         | 1.80E-02    | -2.815  | Blaveri 2 (93)          | 27  | 3   |
| Bladder       | Cancer, superficial                    |                |         | 7.48E-05    | -2.391  | Dyrskjot 3 (60)         | 28  | 9   |
| Bladder       | Cancer, superficial                    |                |         | 7.37E-12    | -3.128  | Lee (256)               | 126 | 68  |
| Bladder       | Cancer, superficial                    | 9.00E-03       | -1.731  | 1.74E-18    | -10.666 | Sanchez-Carbayo 2 (157) | 28  | 48  |
| Bladder       | Carcinoma, urothelial infiltrating     | 3.10E-02       | 1.462   |             |         | Dyrskjot 3 (60)         | 13  | 9   |
| Bladder       | Carcinoma, urothelial infiltrating     |                |         | 2.96E-05    | -2.022  | Lee (256)               | 62  | 68  |
| Bladder       | Carcinoma, urothelial infiltrating     | 6.00E-03       | 1.248   | 1.30E-21    | -3.880  | Sanchez-Carbayo 2 (157) | 81  | 48  |
| Brain         | Astrocytoma                            | 1.00E-02       | 2.090   | 4.70E-02    | 5.614   | Rickman (51)            | 45  | 6   |
| Brain         | Astrocytoma                            | 9.00E-03       | 1.524   |             |         | Shai (42)               | 5   | 7   |
| Brain         | Astrocytoma, anaplastic                | 3.30E-02       | 1.672   | 4.10E-02    | 1.466   | Sun (180)               | 19  | 23  |
| Brain         | Astrocytoma, pilocytic                 |                |         | 2.50E-02    | 3.861   | Gutmann (15)            | 8   | 3   |
| Brain         | Glioblastoma                           |                |         | 4.25E-04    | 2.934   | Bredel 2 (54)           | 27  | 4   |
| Brain         | Glioblastoma                           | 8.00E-03       | -1.728  | 3.66E-09    | 8.409   | Lee (101)               | 22  | 3   |
| Brain         | Glioblastoma                           |                |         | 3.05E-04    | 2.878   | Liang (38)              | 30  | 2   |
| Brain         | Glioblastoma                           | 2.84E-04       | 1.863   | 2.12E-08    | 3.810   | Murat (84)              | 80  | 4   |
| Brain         | Glioblastoma                           | 1.40E-05       | 2.117   | 4.67E-06    | 3.153   | Shai (42)               | 27  | 7   |
| Brain         | Glioblastoma                           | 1.64E-05       | 2.898   | 5.47E-19    | 3.714   | Sun (180)               | 81  | 23  |
| Brain         | Glioblastoma                           | 2.32E-05       | 2.055   | 1.79E-21    | 5.771   | TCGA (557)              | 542 | 10  |
| Brain         | Glioblastoma, malignant glioma         |                |         | 3.40E-02    | 47.793  | Pomeroy (85)            | 10  | 4   |
| Brain         | Oligoastrocytoma, anaplastic           |                |         | 1.20E-02    | -1.562  | Bredel 2 (54)           | 6   | 4   |
| Brain         | Oligoastrocytoma, anaplastic           | 2.80E-02       | 2.368   |             |         | French (33)             | 4   | 6   |
| Brain         | Oligodendroglioma                      |                |         | 2.50E-02    | -1.437  | Bredel 2 (54)           | 5   | 4   |
| Brain         | Oligodendroglioma                      | 3.97E-04       | 1.871   |             |         | Shai (42)               | 3   | 7   |
| Brain         | Oligodendroglioma, anaplastic          | 2.00E-03       | 1.788   | 6.00E-03    | 1.676   | French (33)             | 23  | 6   |
| Breast        | Adenocarcinoma, intraductal cribriform |                |         | 1.00E-03    | -5.777  | TCGA (593)              | 3   | 61  |
| Breast        | Carcinoma                              | no data        | no data | 8.39E-13    | -4.565  | Curtis (2,136)          | 14  | 144 |
| Breast        | Carcinoma, ductal                      | 1.60E-02       | 1.158   | 5.00E-03    | -9.284  | Perou (65)              | 36  | 3   |
| Breast        | Carcinoma, ductal                      | 2.19E-05       | 4.208   | 2.42E-09    | -8.398  | Richardson 2 (47)       | 40  | 7   |
| Breast        | Carcinoma, ductal                      |                |         | 2.01E-06    | -5.473  | Sorlie (85)             | 65  | 4   |
| Breast        | Carcinoma, ductal                      |                |         | 9.14E-27    | -5.462  | Sorlie 2 (167)          | 94  | 4   |
| Breast        | Carcinoma, ductal and lobular invasive | no data        | no data | 1.68E-48    | -5.400  | Curtis (2,136)          | 90  | 144 |
| Breast        | Carcinoma, ductal and lobular invasive |                |         | 9.05E-05    | -8.837  | TCGA (593)              | 3   | 61  |
| Breast        | Carcinoma, ductal and lobular mixed    | 1.30E-02       | 1.521   | 8.31E-12    | -4.730  | TCGA (593)              | 7   | 61  |
| Breast        | Carcinoma, ductal in situ              | no data        | no data | 5.57E-06    | -3.550  | Curtis (2,136)          | 10  | 144 |

## Biomarkers for polyamine transport in pancreatic cancers

|        |                                                |          |         |          |         |                      |      |     |
|--------|------------------------------------------------|----------|---------|----------|---------|----------------------|------|-----|
| Breast | Carcinoma, ductal in situ epithelia            | 2.77E-04 | 1.615   | 1.28E-05 | -4.516  | Ma 4 (66)            | 9    | 14  |
| Breast | Carcinoma, ductal in situ stroma               | 4.00E-02 | 1.387   |          |         | Ma 4 (66)            | 11   | 14  |
| Breast | Carcinoma, ductal invasive                     | no data  | no data | 8.68E-91 | -7.821  | Curtis (2,136)       | 1556 | 144 |
| Breast | Carcinoma, ductal invasive                     |          |         | 3.60E-02 | -1.574  | Karnoub (22)         | 7    | 15  |
| Breast | Carcinoma, ductal invasive                     | 6.00E-03 | 1.793   | 8.00E-03 | -3.683  | Ma 4 (66)            | 9    | 14  |
| Breast | Carcinoma, ductal invasive                     |          |         | 1.20E-02 | -2.054  | Radvanyi (63)        | 31   | 9   |
| Breast | Carcinoma, ductal invasive                     | 3.34E-17 | 1.885   | 1.00E-40 | -11.297 | TCGA (593)           | 389  | 61  |
| Breast | Carcinoma, ductal invasive                     | 3.90E-02 | 1.722   | 2.10E-02 | -5.086  | Turashvili (30)      | 5    | 10  |
| Breast | Carcinoma, ductal invasive                     |          |         | 3.30E-02 | -3.885  | Zhao (64)            | 37   | 3   |
| Breast | Carcinoma, invasive                            | no data  | no data | 1.17E-12 | -4.065  | Curtis (2,136)       | 21   | 144 |
| Breast | Carcinoma, invasive                            |          |         | 6.00E-03 | -4.771  | Gluck (158)          | 154  | 4   |
| Breast | Carcinoma, invasive                            | 1.12E-06 | 1.500   | 1.92E-35 | -7.607  | TCGA (593)           | 76   | 61  |
| Breast | Carcinoma, invasive stroma                     | 3.07E-07 | 2.405   | 2.62E-31 | -31.695 | Finak (59)           | 53   | 6   |
| Breast | Carcinoma, lobular                             |          |         | 1.80E-02 | -3.568  | Perou (65)           | 4    | 3   |
| Breast | Carcinoma, lobular                             |          |         | 7.00E-03 | -12.424 | Sorlie (85)          | 4    | 4   |
| Breast | Carcinoma, lobular                             |          |         | 3.00E-03 | -6.906  | Sorlie 2 (167)       | 7    | 4   |
| Breast | Carcinoma, lobular invasive                    | no data  | no data | 2.23E-60 | -4.900  | Curtis (2,136)       | 148  | 144 |
| Breast | Carcinoma, lobular invasive                    | 5.90E-04 | 1.335   | 8.58E-20 | -6.366  | TCGA (593)           | 36   | 61  |
| Breast | Carcinoma, male                                | 3.75E-09 | 2.072   | 1.14E-04 | -8.963  | TCGA (593)           | 3    | 61  |
| Breast | Carcinoma, medullary                           | no data  | no data | 6.01E-28 | -4.592  | Curtis (2,136)       | 32   | 144 |
| Breast | Carcinoma, mixed invasive                      |          |         | 3.30E-02 | -1.721  | Radvanyi (63)        | 3    | 9   |
| Breast | Carcinoma, mucinous                            | no data  | no data | 3.94E-37 | -4.257  | Curtis (2,136)       | 46   | 144 |
| Breast | Carcinoma, mucinous                            |          |         | 7.32E-06 | -5.711  | TCGA (593)           | 4    | 61  |
| Breast | Carcinoma, tubular                             | no data  | no data | 6.91E-45 | -3.784  | Curtis (2,136)       | 67   | 144 |
| Breast | Fibroadenoma                                   |          |         | 5.10E-04 | -14.128 | Sorlie (85)          | 3    | 4   |
| Breast | Fibroadenoma                                   |          |         | 4.72E-04 | -12.864 | Sorlie 2 (167)       | 3    | 4   |
| Breast | Neoplasm, benign                               | no data  | no data | 2.89E-04 | -2.730  | Curtis (2,136)       | 3    | 144 |
| Breast | Tumor, phyllodes                               | no data  | no data | 6.00E-03 | -4.268  | Curtis (2,136)       | 5    | 144 |
| Cervix | Cancer                                         | 3.17E-10 | 3.643   |          |         | Pyeon (84)           | 20   | 8   |
| Cervix | Carcinoma, squamous cell (SCC)                 | 1.41E-04 | 2.250   | 3.50E-07 | -1.684  | Biewenga (45)        | 40   | 5   |
| Cervix | Carcinoma, squamous cell (SCC)                 | 1.82E-10 | 3.145   | 1.00E-02 | -1.526  | Scotto 2 (66)        | 32   | 21  |
| Cervix | Carcinoma, squamous cell (SCC)                 | 4.82E-07 | 2.713   | 1.00E-02 | -1.767  | Zhai (41)            | 21   | 10  |
| Cervix | Neoplasia, intraepithelial squamous high grade |          |         | 4.50E-02 | -1.420  | Zhai (41)            | 7    | 10  |
| Colon  | Adenocarcinoma                                 | 5.01E-04 | 1.572   | 3.10E-02 | -1.310  | Kaiser (105)         | 41   | 5   |
| Colon  | Adenocarcinoma                                 | no data  | no data | 1.17E-09 | -14.481 | Notterman (36)       | 18   | 18  |
| Colon  | Adenocarcinoma                                 | 3.01E-10 | 2.096   | 2.75E-07 | -3.070  | TCGA (237)           | 101  | 19  |
| Colon  | Adenocarcinoma, cecum                          | 3.00E-03 | 1.354   | 4.00E-03 | -1.574  | Kaiser (105)         | 17   | 5   |
| Colon  | Adenocarcinoma, cecum                          | 3.07E-10 | 2.146   | 1.56E-07 | -3.005  | TCGA (237)           | 22   | 19  |
| Colon  | Adenocarcinoma, mucinous                       | 1.00E-02 | 1.270   |          |         | Kaiser (105)         | 13   | 5   |
| Colon  | Adenocarcinoma, mucinous                       | 2.87E-05 | 1.707   | 1.00E-03 | -1.929  | TCGA (237)           | 22   | 19  |
| Colon  | Adenocarcinoma, rectal                         | 2.10E-02 | 1.292   |          |         | Kaiser (105)         | 8    | 5   |
| Colon  | Adenocarcinoma, rectal                         | 4.60E-02 | 1.100   | 5.00E-03 | -1.472  | Skrzypczak (105)     | 45   | 24  |
| Colon  | Adenocarcinoma, rectal                         | 4.47E-11 | 2.208   | 2.36E-08 | -3.322  | TCGA (237)           | 60   | 19  |
| Colon  | Adenocarcinoma, rectal mucinous                | 7.21E-05 | 2.121   |          |         | Kaiser (105)         | 4    | 5   |
| Colon  | Adenocarcinoma, rectal mucinous                | 1.44E-04 | 1.960   | 2.77E-04 | -3.406  | TCGA (237)           | 6    | 19  |
| Colon  | Adenocarcinoma, rectosigmoid                   | 1.89E-04 | 1.613   |          |         | Kaiser (105)         | 10   | 5   |
| Colon  | Adenocarcinoma, rectosigmoid                   | 3.40E-02 | 2.192   | 1.57E-05 | -2.346  | TCGA (237)           | 3    | 19  |
| Colon  | Adenoma                                        | 6.07E-06 | 1.520   |          |         | Sabates-Bellver (64) | 25   | 5   |
| Colon  | Adenoma                                        | 2.00E-02 | 1.180   |          |         | Skrzypczak (105)     | 5    | 10  |
| Colon  | Adenoma                                        |          |         | 6.00E-03 | -1.407  | Skrzypczak 2 (40)    | 5    | 10  |
| Colon  | Adenoma, rectal                                | 7.33E-04 | 1.925   |          |         | Sabates-Bellver (64) | 7    | 7   |
| Colon  | Carcinoma                                      | 1.96E-04 | 1.374   | 3.60E-02 | -1.252  | Skrzypczak (105)     | 5    | 10  |
| Colon  | Carcinoma, colorectal                          | 2.84E-07 | 1.828   | 2.00E-03 | -1.412  | Hong (82)            | 70   | 12  |
| Colon  | Carcinoma, colorectal                          | 1.00E-03 | 1.242   |          |         | Skrzypczak (105)     | 36   | 24  |
| Colon  | Carcinoma, epithelia                           | 3.91E-07 | 1.692   |          |         | Skrzypczak (105)     | 5    | 10  |
| Colon  | Carcinoma, epithelia                           |          |         | 5.00E-03 | -1.834  | Skrzypczak 2 (40)    | 5    | 10  |

## Biomarkers for polyamine transport in pancreatic cancers

|                  |                                                       |                 |              |                 |               |                            |           |           |
|------------------|-------------------------------------------------------|-----------------|--------------|-----------------|---------------|----------------------------|-----------|-----------|
| Esophagus        | Adenocarcinoma                                        | 4.00E-03        | 1.759        | 5.00E-03        | 5.799         | Hao (48)                   | 5         | 14        |
| Esophagus        | Adenocarcinoma                                        |                 |              | 7.62E-04        | 1.323         | Kim (118)                  | 75        | 28        |
| Esophagus        | Adenocarcinoma                                        | 4.00E-03        | 1.689        |                 |               | Kimchi (24)                | 8         | 8         |
| Esophagus        | Barrett's                                             |                 |              | 3.26E-05        | 2.233         | Hao (48)                   | 14        | 14        |
| Esophagus        | Barrett's                                             | 1.10E-02        | -2.139       |                 |               | Kimchi (24)                | 8         | 8         |
| Esophagus        | Carcinoma, squamous cell (SCC)                        | 4.14E-08        | 1.923        |                 |               | Hu (34)                    | 17        | 17        |
| Esophagus        | Carcinoma, squamous cell (SCC)                        | 2.84E-15        | 1.635        | 7.00E-03        | 1.389         | Su 2 (106)                 | 53        | 53        |
| Germ cell        | Carcinoma, embryonal                                  | 7.43E-07        | 2.304        | 7.10E-09        | 2.670         | Korkola (107)              | 15        | 6         |
| Germ cell        | Carcinoma, embryonal                                  |                 |              | 3.70E-02        | 1.962         | Skotheim (30)              | 5         | 3         |
| Germ cell        | Mixed                                                 | 2.82E-10        | 1.858        | 1.48E-05        | 1.777         | Korkola (107)              | 41        | 6         |
| Germ cell        | Seminoma                                              | 1.00E-03        | 1.428        |                 |               | Korkola (107)              | 12        | 6         |
| <b>Germ cell</b> | <b>Seminoma</b>                                       | <b>3.80E-02</b> | <b>1.237</b> | <b>8.70E-06</b> | <b>-2.742</b> | <b>Sperger Others (74)</b> | <b>23</b> | <b>14</b> |
| Germ cell        | Teratoma                                              | 2.90E-05        | 1.758        | 3.08E-10        | 4.376         | Korkola (107)              | 14        | 6         |
| Germ cell        | Tumor, yolk sac                                       | 1.10E-06        | 3.492        |                 |               | Korkola (107)              | 9         | 6         |
| Germ cell        | Tumor, yolk sac                                       | 4.60E-02        | 1.341        |                 |               | Skotheim (30)              | 4         | 3         |
| Head & Neck      | Adenoma, parathyroid gland                            | 8.00E-03        | 1.278        | 2.40E-02        | 1.438         | Morrison (61)              | 35        | 5         |
| Head & Neck      | Adenoma, thyroid gland follicular                     |                 |              | 9.77E-04        | -1.406        | Giordano (99)              | 10        | 4         |
| Head & Neck      | Adenoma, thyroid gland oncocytic                      | 8.68E-04        | -1.228       | 1.63E-05        | -1.443        | Giordano (99)              | 7         | 4         |
| Head & Neck      | Carcinoma, floor of the mouth                         | 4.79E-04        | 2.389        | 2.20E-02        | 3.723         | Pyeon (84)                 | 5         | 9         |
| Head & Neck      | Carcinoma, nasopharyngeal                             |                 |              | 1.90E-07        | 2.724         | Sengupta (41)              | 31        | 10        |
| Head & Neck      | Carcinoma, oral cavity                                | 4.00E-03        | 3.263        | 5.00E-03        | 3.366         | Pyeon (84)                 | 4         | 9         |
| Head & Neck      | Carcinoma, oropharyngeal                              | 2.20E-04        | 2.412        | 5.00E-03        | 2.464         | Pyeon (84)                 | 6         | 9         |
| Head & Neck      | Carcinoma, salivary gland adenoid cystic              | 6.55E-04        | 1.853        | 2.10E-02        | 1.609         | FriersonHF (22)            | 16        | 6         |
| Head & Neck      | Carcinoma, squamous cell (SCC)                        | 4.00E-03        | 2.676        | 1.00E-03        | 2.650         | Cromer (38)                | 34        | 4         |
| Head & Neck      | Carcinoma, squamous cell (SCC)                        | 3.25E-10        | 3.355        | 1.40E-02        | 1.556         | Ginos (54)                 | 41        | 13        |
| Head & Neck      | Carcinoma, squamous cell (SCC) hypopharyngeal         |                 |              | 3.20E-02        | 4.918         | Schlingemann (12)          | 4         | 3         |
| Head & Neck      | Carcinoma, squamous cell (SCC) oral cavity            | 1.24E-11        | 2.571        | 1.41E-10        | 1.889         | Peng (79)                  | 57        | 22        |
| Head & Neck      | Carcinoma, squamous cell (SCC) tongue                 | 2.45E-10        | 3.290        | 4.05E-05        | 2.203         | Estilo (58)                | 31        | 26        |
| Head & Neck      | Carcinoma, squamous cell (SCC) tongue                 | 2.34E-10        | 1.988        | 1.09E-04        | 2.170         | Talbot Lung (93)           | 31        | 26        |
| Head & Neck      | Carcinoma, squamous cell (SCC) tongue                 | 6.92E-04        | 1.766        | 1.30E-02        | 1.991         | Ye (38)                    | 26        | 12        |
| Head & Neck      | Carcinoma, thyroid gland anaplastic                   | 6.00E-03        | -1.160       |                 |               | Giordano (99)              | 4         | 4         |
| Head & Neck      | Carcinoma, thyroid gland follicular                   |                 |              | 2.74E-05        | -1.392        | Giordano (99)              | 13        | 4         |
| Head & Neck      | Carcinoma, thyroid gland follicular oncocytic         | 9.19E-04        | -1.255       | 2.43E-05        | -1.573        | Giordano (99)              | 8         | 4         |
| Head & Neck      | Carcinoma, thyroid gland papillary                    |                 |              | 6.00E-03        | -1.270        | Giordano (99)              | 26        | 4         |
| Head & Neck      | Carcinoma, thyroid gland papillary                    | 2.30E-02        | -1.633       | 3.00E-02        | -1.830        | He (18)                    | 9         | 9         |
| Head & Neck      | Carcinoma, thyroid gland papillary                    | 2.70E-02        | -1.504       |                 |               | Vasko (18)                 | 14        | 4         |
| Head & Neck      | Carcinoma, thyroid gland papillary follicular variant |                 |              | 3.49E-06        | -1.434        | Giordano (99)              | 15        | 6         |
| Head & Neck      | Carcinoma, thyroid gland papillary tall cell variant  |                 |              | 6.00E-03        | -1.308        | Giordano (99)              | 10        | 4         |
| Head & Neck      | Carcinoma, tongue                                     | 4.55E-07        | 2.295        | 3.91E-06        | 3.727         | Pyeon (84)                 | 15        | 4         |
| Head & Neck      | Hyperplasia, parathyroid                              | 2.30E-02        | 1.322        |                 |               | Morrison (61)              | 8         | 5         |
| Head & Neck      | Neoplasia, non-familial multiple gland                | 9.00E-03        | 1.361        |                 |               | Morrison (61)              | 10        | 5         |
| Kidney           | Carcinoma, chromophobe cell                           |                 |              | 6.00E-03        | 4.516         | Higgins (44)               | 3         | 2         |
| Kidney           | Carcinoma, chromophobe cell                           | 4.00E-03        | -1.634       |                 |               | Jones (92)                 | 6         | 23        |
| Kidney           | Carcinoma, chromophobe cell                           | 9.64E-04        | -3.749       | 3.00E-03        | 4.721         | Yusenko (67)               | 4         | 3         |
| Kidney           | Carcinoma, clear cell (ccRCC)                         | 7.47E-05        | 1.983        | 2.09E-10        | 8.172         | Gumz (20)                  | 10        | 10        |
| Kidney           | Carcinoma, clear cell (ccRCC)                         |                 |              | 1.26E-04        | 5.272         | Higgins (44)               | 26        | 2         |
| Kidney           | Carcinoma, clear cell (ccRCC)                         | 4.17E-06        | 1.696        | 7.02E-21        | 9.349         | Jones (92)                 | 23        | 23        |
| Kidney           | Carcinoma, clear cell (ccRCC)                         |                 |              | 5.57E-07        | 9.378         | Lenburg (18)               | 9         | 9         |
| Kidney           | Carcinoma, clear cell (ccRCC)                         | 2.00E-03        | 2.715        | 8.04E-12        | 5.028         | Yusenko (67)               | 26        | 3         |
| Kidney           | Carcinoma, clear cell (ccRCC) hereditary              | 1.09E-08        | 1.750        | 4.93E-11        | 7.077         | Beroukhim (70)             | 32        | 10        |
| Kidney           | Carcinoma, clear cell (ccRCC) non-hereditary          | 2.00E-06        | 1.524        | 1.93E-13        | 8.387         | Beroukhim (70)             | 27        | 10        |
| Kidney           | Carcinoma, papillary cell                             |                 |              | 3.40E-02        | -2.309        | Higgins (44)               | 4         | 2         |
| Kidney           | Carcinoma, papillary cell                             | 1.22E-05        | 1.849        | 1.00E-02        | 1.860         | Jones (92)                 | 11        | 23        |
| Kidney           | Carcinoma, papillary cell                             | 2.40E-02        | 2.642        | 7.00E-03        | 1.856         | Yusenko (67)               | 19        | 3         |

## Biomarkers for polyamine transport in pancreatic cancers

|          |                                               |          |        |          |         |                     |     |     |
|----------|-----------------------------------------------|----------|--------|----------|---------|---------------------|-----|-----|
| Kidney   | Oncocytoma                                    | 2.02E-08 | -3.597 | 4.75E-05 | 1.838   | Jones (92)          | 12  | 3   |
| Kidney   | Oncocytoma                                    | 2.00E-03 | -2.800 | 2.76E-04 | 3.406   | Yusenko (67)        | 4   | 3   |
| Kidney   | Wilms                                         |          |        | 5.54E-04 | -2.195  | Cutcliffe (35)      | 18  | 3   |
| Leukemia | Hairy cell (HCL)                              |          |        | 2.99E-04 | 5.626   | Basso (336)         | 16  | 5   |
| Leukemia | Leukemia/Lymphoma, T-cell acute adult         |          |        | 3.05E-06 | 9.872   | Choi (47)           | 22  | 6   |
| Leukemia | Leukemia/Lymphoma, T-cell chronic adult       | 6.21E-04 | -1.652 |          |         | Choi (47)           | 19  | 6   |
| Leukemia | Lymphoblastic, B-Cell acute (B-ALL)           | 3.54E-12 | -1.441 |          |         | Haferlach (2,096)   | 147 | 74  |
| Leukemia | Lymphoblastic, B-Cell acute (B-ALL)           | 2.86E-04 | -1.360 |          |         | Maia (28)           | 18  | 5   |
| Leukemia | Lymphoblastic, B-Cell acute (B-ALL) pediatric | 4.30E-02 | 1.659  |          |         | Coustan-Smith (288) | 238 | 4   |
| Leukemia | Lymphoblastic, B-cell acute (B-ALL) pediatric | 2.10E-11 | -1.380 | 2.96E-05 | 1.130   | Haferlach (2,096)   | 359 | 74  |
| Leukemia | Lymphoblastic, pro-B acute (pro-B-ALL)        | 3.15E-10 | -1.458 | 2.45E-08 | -1.173  | Haferlach (2,096)   | 70  | 74  |
| Leukemia | Lymphoblastic, T-cell acute (T-ALL)           |          |        | 3.50E-02 | -1.071  | Haferlach (2,096)   | 174 | 74  |
| Leukemia | Lymphoblastic, T-cell acute (T-ALL) pediatric | 9.00E-03 | 2.411  |          |         | Coustan-Smith (288) | 46  | 4   |
| Leukemia | Lymphocytic, chronic (CLL)                    | 1.56E-05 | -1.913 |          |         | Basso (336)         | 34  | 5   |
| Leukemia | Lymphocytic, chronic (CLL)                    | 7.66E-15 | -1.474 | 1.74E-06 | 1.122   | Haferlach (2,096)   | 448 | 74  |
| Leukemia | Myeloid, acute (AML)                          | 4.10E-02 | 1.335  | 1.20E-02 | 1.930   | Andersson (127)     | 23  | 6   |
| Leukemia | Myeloid, acute (AML)                          | 1.80E-02 | -1.097 | 1.17E-14 | 1.352   | Haferlach (2,096)   | 542 | 74  |
| Leukemia | Syndrome, myelodysplastic (MDS)               | 3.00E-04 | 1.169  | 1.00E-03 | 1.094   | Haferlach (2,096)   | 206 | 74  |
| Liver    | Carcinoma, hepatocellular (HCC)               |          |        | 3.00E-02 | 1.228   | Chen (197)          | 104 | 76  |
| Liver    | Carcinoma, hepatocellular (HCC)               | 7.56E-06 | -1.469 | 4.18E-06 | 1.829   | Mas (115)           | 38  | 19  |
| Liver    | Carcinoma, hepatocellular (HCC)               | 2.80E-02 | -1.167 | 1.00E-03 | 1.956   | Roessler (43)       | 22  | 21  |
| Liver    | Carcinoma, hepatocellular (HCC)               | 1.60E-02 | -1.081 | 9.06E-15 | 1.537   | Roessler 2 (445)    | 225 | 220 |
| Liver    | Carcinoma, hepatocellular (HCC)               | 4.00E-03 | -1.946 |          |         | Wurmbach (75)       | 35  | 10  |
| Liver    | Cirrhosis                                     | 2.98E-07 | -1.546 | 3.66E-12 | 3.050   | Mas (115)           | 58  | 19  |
| Liver    | Cirrhosis                                     | 5.00E-03 | -1.954 | 4.00E-03 | 1.941   | Wurmbach (75)       | 13  | 10  |
| Liver    | Dysplasia, liver cell                         | 1.60E-02 | 1.142  | 2.20E-02 | -1.349  | Wurmbach (75)       | 17  | 10  |
| Lung     | Adenocarcinoma                                |          |        | 3.48E-17 | -8.702  | Beer (96)           | 86  | 10  |
| Lung     | Adenocarcinoma                                |          |        | 7.63E-10 | -18.950 | Bhattacharjee (203) | 132 | 17  |
| Lung     | Adenocarcinoma                                |          |        | 9.31E-15 | -7.455  | Garber (73)         | 40  | 5   |
| Lung     | Adenocarcinoma                                | 9.25E-07 | 1.680  | 2.38E-16 | -5.163  | Hou (156)           | 45  | 65  |
| Lung     | Adenocarcinoma                                |          |        | 2.59E-46 | -11.725 | Selamat (116)       | 58  | 58  |
| Lung     | Adenocarcinoma                                |          |        | 7.94E-08 | -6.292  | Stearman (39)       | 20  | 19  |
| Lung     | Adenocarcinoma                                |          |        | 1.70E-12 | -7.611  | Su (66)             | 27  | 30  |
| Lung     | Adenocarcinoma                                | 2.39E-04 | 1.200  | 2.17E-33 | -6.393  | Landi (107)         | 58  | 49  |
| Lung     | Adenocarcinoma                                | 6.52E-05 | 1.354  | 2.69E-33 | -4.377  | Okayama (246)       | 226 | 20  |
| Lung     | Carcinoid                                     | 3.00E-03 | -2.663 | 2.10E-13 | -66.005 | Bhattacharjee (203) | 20  | 17  |
| Lung     | Carcinoma, large cell                         | 9.60E-05 | 2.144  | 3.87E-11 | -12.444 | Hou (156)           | 19  | 65  |
| Lung     | Carcinoma, large cell                         | 1.10E-02 | 2.486  |          |         | Yamagata (31)       | 5   | 3   |
| Lung     | Carcinoma, small cell                         |          |        | 3.19E-05 | -41.875 | Bhattacharjee (203) | 6   | 17  |
| Lung     | Carcinoma, small cell                         |          |        | 1.30E-02 | -10.984 | Garber (73)         | 4   | 5   |
| Lung     | Carcinoma, squamous cell (SCC)                | 5.00E-03 | 2.531  | 8.96E-06 | -6.689  | Bhattacharjee (203) | 21  | 17  |
| Lung     | Carcinoma, squamous cell (SCC)                | 3.10E-02 | 1.377  | 2.26E-10 | -8.268  | Garber (73)         | 13  | 5   |
| Lung     | Carcinoma, squamous cell (SCC)                | 1.46E-08 | 2.130  | 1.09E-14 | -1.711  | Hou (156)           | 27  | 65  |
| Lung     | Carcinoma, squamous cell (SCC)                | 1.97E-09 | 1.941  | 8.00E-03 | -1.711  | Talbot (93)         | 34  | 26  |
| Lung     | Carcinoma, squamous cell (SCC)                | 3.80E-02 | 1.311  | 9.87E-06 | -7.840  | Wachi (10)          | 5   | 5   |
| Lung     | Carcinoma, squamous cell (SCC)                | 6.00E-03 | 2.230  |          |         | Yamagata (31)       | 10  | 3   |
| Lung     | Mesothelioma, pleural malignant               | 9.00E-03 | 1.679  | 1.00E-03 | -2.575  | Gordon (54)         | 40  | 5   |
| Lymphoma | Angioimmunoblastic, T-cell                    | 1.86E-08 | 2.600  | 2.69E-05 | 6.141   | Piccaluga (60)      | 6   | 5   |
| Lymphoma | Burkitt's                                     |          |        | 7.08E-08 | 10.240  | Basso (336)         | 17  | 5   |
| Lymphoma | Burkitt's                                     | 4.07E-04 | -1.392 | 2.70E-02 | 1.273   | Brune (67)          | 5   | 5   |
| Lymphoma | Centroblastic                                 | 4.80E-02 | 1.365  | 2.18E-14 | 14.838  | Basso (336)         | 28  | 5   |
| Lymphoma | Effusion, primary                             |          |        | 2.00E-03 | 8.972   | Basso (336)         | 9   | 5   |
| Lymphoma | Follicular                                    | 3.90E-02 | -1.727 | 7.69E-04 | 2.384   | Basso (336)         | 6   | 5   |
| Lymphoma | Follicular                                    |          |        | 8.00E-03 | 1.369   | Brune (67)          | 5   | 5   |
| Lymphoma | Follicular                                    | 7.00E-03 | -1.297 | 5.37E-23 | 11.075  | Compagno (136)      | 38  | 5   |
| Lymphoma | Hodgkin's                                     |          |        | 2.45E-04 | 1.999   | Brune (67)          | 12  | 5   |

## Biomarkers for polyamine transport in pancreatic cancers

|                 |                                                       |                 |              |                 |               |                       |            |           |
|-----------------|-------------------------------------------------------|-----------------|--------------|-----------------|---------------|-----------------------|------------|-----------|
| Lymphoma        | Hodgkin's, classical                                  | 2.10E-02        | 1.142        | 1.30E-02        | 1.326         | Eckerle (64)          | 4          | 5         |
| Lymphoma        | Hodgkin's, nodular lymphocyte predominant             | 3.20E-02        | 1.136        | 1.00E-03        | 4.433         | Brune (67)            | 5          | 5         |
| Lymphoma        | Large cell, anaplastic                                | 3.91E-09        | 2.746        | 5.28E-05        | 6.090         | Piccaluga (60)        | 6          | 5         |
| Lymphoma        | Large cell, anaplastic ALK-positive                   | 2.00E-03        | 1.121        | 5.30E-05        | 1.965         | Eckerle (64)          | 5          | 5         |
| Lymphoma        | Large cell, primary cutaneous anaplastic              | 2.50E-02        | -1.707       |                 |               | Eckerle (64)          | 7          | 5         |
| Lymphoma        | Large, B-cell T-cell/histiocyte-rich                  |                 |              | 3.31E-04        | 2.105         | Brune (67)            | 4          | 5         |
| Lymphoma        | Lymphoma, diffuse large B-cell (DLBCL)                | 2.42E-04        | 1.960        | 4.61E-09        | 9.840         | Basso (336)           | 32         | 5         |
| Lymphoma        | Lymphoma, diffuse large B-cell (DLBCL)                | 4.10E-02        | 1.230        | 6.83E-05        | 1.650         | Brune (67)            | 11         | 5         |
| Lymphoma        | Lymphoma, diffuse large B-cell (DLBCL)                | 2.60E-02        | 1.198        | 5.16E-27        | 16.343        | Compagno (136)        | 44         | 5         |
| Lymphoma        | Lymphoma, diffuse large B-cell (DLBCL)-like activated | 7.63E-04        | 1.530        | 1.19E-15        | 13.262        | Compagno (136)        | 17         | 5         |
| Lymphoma        | Lymphoma, diffuse large B-cell (DLBCL)-like germinal  | 2.60E-02        | -1.630       | 1.20E-11        | 10.997        | Compagno (136)        | 9          | 5         |
| <b>Lymphoma</b> | <b>Mantle cell</b>                                    | <b>2.50E-02</b> | <b>1.636</b> | <b>5.00E-03</b> | <b>-3.053</b> | <b>Basso (336)</b>    | <b>8</b>   | <b>5</b>  |
| Lymphoma        | Marginal zone, B-cell                                 |                 |              | 5.00E-03        | 1.869         | Storz (27)            | 5          | 3         |
| Lymphoma        | T-cell, unspecified peripheral                        | 9.45E-09        | 2.107        | 5.07E-05        | 4.782         | Piccaluga (60)        | 28         | 5         |
| Myeloma         | Gammopathy, monoclonal of undetermined significance   |                 |              | 3.10E-02        | -1.418        | Agnelli 3 (158)       | 11         | 5         |
| Myeloma         | Gammopathy, monoclonal of undetermined significance   | 1.60E-04        | 1.419        |                 |               | Zhan 3 (78)           | 44         | 22        |
| Myeloma         | Leukemia, plasma cell                                 | 4.00E-03        | 1.570        |                 |               | Agnelli 3 (158)       | 9          | 5         |
| Myeloma         | Leukemia, plasma cell                                 | 3.10E-02        | 1.526        |                 |               | Zhan (131)            | 5          | 37        |
| Myeloma         | Multiple                                              | 8.04E-09        | 1.873        | 6.00E-03        | 1.689         | Zhan (131)            | 74         | 37        |
| Myeloma         | Multiple                                              | 1.40E-02        | 1.185        |                 |               | Agnelli 3 (158)       | 133        | 5         |
| Myeloma         | Smoldering                                            | 2.58E-05        | 2.145        | 4.60E-02        | 1.786         | Zhan 3 (78)           | 12         | 22        |
| <b>Ovary</b>    | <b>Adenocarcinoma, clear cell</b>                     | <b>2.00E-03</b> | <b>1.140</b> | <b>2.20E-08</b> | <b>-1.884</b> | <b>Hendrix (103)</b>  | <b>8</b>   | <b>4</b>  |
| Ovary           | Adenocarcinoma, clear cell                            |                 |              | 9.34E-04        | -4.935        | Lu (50)               | 12         | 4         |
| <b>Ovary</b>    | <b>Adenocarcinoma, endometrioid</b>                   | <b>3.43E-04</b> | <b>1.165</b> | <b>2.05E-12</b> | <b>-1.725</b> | <b>Hendrix (103)</b>  | <b>37</b>  | <b>4</b>  |
| Ovary           | Adenocarcinoma, endometrioid                          | 1.90E-02        | 1.237        | 1.00E-03        | -4.725        | Lu (50)               | 9          | 5         |
| Ovary           | Adenocarcinoma, mucinous                              | 4.00E-03        | 1.103        | 2.09E-07        | -1.558        | Hendrix (103)         | 13         | 4         |
| <b>Ovary</b>    | <b>Adenocarcinoma, mucinous</b>                       | <b>1.60E-02</b> | <b>1.585</b> | <b>1.80E-02</b> | <b>-2.764</b> | <b>Lu (50)</b>        | <b>9</b>   | <b>5</b>  |
| Ovary           | Adenocarcinoma, serous                                |                 |              | 3.94E-04        | -6.790        | Adib (16)             | 12         | 4         |
| <b>Ovary</b>    | <b>Adenocarcinoma, serous</b>                         | <b>5.70E-05</b> | <b>1.230</b> | <b>2.15E-11</b> | <b>-1.704</b> | <b>Hendrix (103)</b>  | <b>41</b>  | <b>5</b>  |
| <b>Ovary</b>    | <b>Adenocarcinoma, serous</b>                         | <b>1.00E-03</b> | <b>1.388</b> | <b>1.00E-03</b> | <b>-4.970</b> | <b>Lu (50)</b>        | <b>20</b>  | <b>5</b>  |
| Ovary           | Adenocarcinoma, serous                                |                 |              | 1.52E-29        | -23.044       | Yoshihara (53)        | 43         | 10        |
| <b>Ovary</b>    | <b>Carcinoma</b>                                      | <b>2.68E-05</b> | <b>1.362</b> | <b>3.91E-10</b> | <b>-7.582</b> | <b>Bonome (195)</b>   | <b>185</b> | <b>10</b> |
| Ovary           | Carcinoma, serous surface papillary                   | 5.97E-04        | 3.416        | 8.20E-06        | -46.045       | Welsh (32)            | 28         | 4         |
| <b>Ovary</b>    | <b>Cystadenocarcinoma, serous</b>                     | <b>5.92E-07</b> | <b>1.693</b> | <b>2.72E-06</b> | <b>-3.555</b> | <b>TCGA (594)</b>     | <b>586</b> | <b>8</b>  |
| Pancreas        | Adenocarcinoma                                        | 4.00E-03        | 2.160        |                 |               | Logsdon (27)          | 27         | 5         |
| Pancreas        | Adenocarcinoma, ductal                                | 1.40E-09        | 2.079        | 5.00E-03        | 1.668         | Badea (78)            | 39         | 39        |
| Pancreas        | Adenocarcinoma, ductal                                |                 |              | 3.80E-02        | -1.295        | Buchholz (38)         | 11         | 5         |
| Pancreas        | Adenocarcinoma, ductal                                |                 |              | 1.50E-02        | 1.540         | Ishikawa (49)         | 24         | 25        |
| Pancreas        | Carcinoma                                             | 1.70E-02        | 1.468        |                 |               | Pei (52)              | 36         | 16        |
| <b>Prostate</b> | <b>Adenocarcinoma</b>                                 | <b>3.30E-02</b> | <b>1.164</b> | <b>7.07E-05</b> | <b>-2.456</b> | <b>Vanaja (40)</b>    | <b>27</b>  | <b>8</b>  |
| Prostate        | Adenocarcinoma                                        |                 |              | 7.05E-04        | -1.581        | Wallace (89)          | 69         | 20        |
| Prostate        | Carcinoma                                             |                 |              | 1.36E-06        | -2.909        | Arredouani (21)       | 13         | 8         |
| <b>Prostate</b> | <b>Carcinoma</b>                                      | <b>4.77E-04</b> | <b>1.246</b> | <b>4.79E-11</b> | <b>-2.548</b> | <b>Grasso (122)</b>   | <b>59</b>  | <b>28</b> |
| Prostate        | Carcinoma                                             | 5.00E-03        | 1.222        |                 |               | Holzbeierlein (54)    | 39         | 4         |
| Prostate        | Carcinoma                                             |                 |              | 1.92E-27        | -3.278        | Lapointe (112)        | 62         | 41        |
| Prostate        | Carcinoma                                             | 1.20E-02        | 1.430        |                 |               | LaTulippe (35)        | 32         | 3         |
| <b>Prostate</b> | <b>Carcinoma</b>                                      | <b>2.00E-03</b> | <b>1.164</b> | <b>1.75E-07</b> | <b>-2.273</b> | <b>Liu (57)</b>       | <b>44</b>  | <b>13</b> |
| <b>Prostate</b> | <b>Carcinoma</b>                                      | <b>4.90E-02</b> | <b>1.411</b> | <b>4.00E-03</b> | <b>-1.838</b> | <b>Luo 2 (30)</b>     | <b>15</b>  | <b>15</b> |
| Prostate        | Carcinoma                                             | 2.10E-02        | 2.004        |                 |               | Magee (15)            | 8          | 4         |
| <b>Prostate</b> | <b>Carcinoma</b>                                      | <b>5.00E-03</b> | <b>2.165</b> | <b>8.00E-03</b> | <b>-1.606</b> | <b>Singh (102)</b>    | <b>52</b>  | <b>50</b> |
| <b>Prostate</b> | <b>Carcinoma</b>                                      | <b>1.00E-03</b> | <b>1.235</b> | <b>4.79E-12</b> | <b>-2.059</b> | <b>Taylor 3 (185)</b> | <b>131</b> | <b>29</b> |
| <b>Prostate</b> | <b>Carcinoma</b>                                      | <b>1.40E-02</b> | <b>1.573</b> | <b>1.10E-02</b> | <b>-1.713</b> | <b>Tomlins (101)</b>  | <b>59</b>  | <b>28</b> |
| Prostate        | Carcinoma                                             |                 |              | 1.00E-03        | -2.199        | Varambally (19)       | 7          | 6         |

## Biomarkers for polyamine transport in pancreatic cancers

|             |                                        |          |        |          |        |                   |    |    |
|-------------|----------------------------------------|----------|--------|----------|--------|-------------------|----|----|
| Prostate    | Carcinoma                              | 7.88E-04 | 1.363  | 1.68E-06 | -3.000 | Welsh (34)        | 25 | 9  |
| Prostate    | Carcinoma                              |          |        | 6.69E-06 | -2.105 | Yu (112)          | 65 | 23 |
| Prostate    | Hyperplasia, benign stroma             | 3.00E-03 | -1.706 |          |        | Tomlins (101)     | 6  | 5  |
| Prostate    | Neoplasia, intraepithelial             | 4.00E-03 | 1.928  | 5.90E-04 | -1.925 | Tomlins (101)     | 13 | 23 |
| Skin        | Carcinoma, basal cell                  | 3.20E-02 | 3.928  |          |        | Riker (87)        | 15 | 4  |
| Skin        | Carcinoma, squamous cell (SCC)         | 3.30E-02 | 2.705  |          |        | Nindl (15)        | 5  | 6  |
| Skin        | Carcinoma, squamous cell (SCC)         | 1.90E-02 | 4.985  |          |        | Riker (87)        | 11 | 4  |
| Skin        | Melanoma, cutaneous                    |          |        | 1.20E-02 | -1.900 | Riker (87)        | 14 | 4  |
| Skin        | Melanoma, cutaneous                    | 6.00E-03 | 3.290  | 2.30E-02 | -1.455 | Talantov (70)     | 45 | 7  |
| Skin        | Nevus, benign melanocytic              | 5.00E-03 | 3.353  | 1.80E-02 | 1.661  | Talantov (70)     | 18 | 7  |
| Soft tissue | Fibrosarcoma                           | 8.71E-04 | 2.957  |          |        | Detwiller (54)    | 7  | 1  |
| Soft tissue | Histiocytoma, malignant fibrous        | 4.82E-06 | 2.953  | 6.00E-03 | 2.756  | Detwiller (54)    | 9  | 1  |
| Soft tissue | Leiomyosarcoma                         |          |        | 9.56E-05 | -2.018 | Barretina (158)   | 26 | 9  |
| Soft tissue | Leiomyosarcoma                         | 4.84E-04 | 3.313  | 3.00E-03 | 2.749  | Detwiller (54)    | 6  | 1  |
| Soft tissue | Leiomyosarcoma                         |          |        | 1.50E-02 | -2.231 | Quade Uterus (24) | 4  | 4  |
| Soft tissue | Liposarcoma, dedifferentiated          |          |        | 1.76E-11 | -3.208 | Barretina (158)   | 46 | 9  |
| Soft tissue | Liposarcoma, dedifferentiated          | 1.70E-02 | 1.845  |          |        | Detwiller (54)    | 4  | 1  |
| Soft tissue | Liposarcoma, myxoid/round cell         | 4.65E-05 | -2.016 | 1.11E-07 | -2.657 | Barretina (158)   | 20 | 9  |
| Soft tissue | Liposarcoma, pleomorphic               |          |        | 3.45E-05 | -2.184 | Barretina (158)   | 23 | 9  |
| Soft tissue | Liposarcoma, pleomorphic               | 2.11E-04 | 2.217  | 2.40E-02 | 3.029  | Detwiller (54)    | 3  | 1  |
| Soft tissue | Liposarcoma, round cell                | 3.90E-02 | 1.447  |          |        | Detwiller (54)    | 4  | 1  |
| Soft tissue | Myxofibrosarcoma                       |          |        | 2.61E-07 | -2.683 | Barretina (158)   | 31 | 9  |
| Soft tissue | Sarcoma, synovial                      | 1.00E-03 | 2.768  |          |        | Detwiller (54)    | 4  | 1  |
| Stomach     | Adenocarcinoma, diffuse                | 3.70E-02 | 1.132  | 1.48E-04 | 1.794  | Chen (132)        | 13 | 28 |
| Stomach     | Adenocarcinoma, diffuse                | 4.60E-02 | 1.114  |          |        | DErrico (69)      | 6  | 31 |
| Stomach     | Adenocarcinoma, intestinal type        | 3.00E-02 | 1.106  | 1.35E-06 | 1.416  | Chen (132)        | 63 | 27 |
| Stomach     | Adenocarcinoma, intestinal type        | 3.57E-06 | 1.725  | 1.60E-02 | 1.432  | DErrico (69)      | 26 | 31 |
| Stomach     | Adenocarcinoma, mixed                  |          |        | 1.30E-02 | 1.351  | Chen (132)        | 8  | 27 |
| Stomach     | Adenocarcinoma, mixed                  | 7.02E-08 | 2.187  |          |        | DErrico (69)      | 4  | 31 |
| Stomach     | Cancer                                 | 7.31E-04 | 1.257  | 5.51E-04 | -1.461 | Cui (160)         | 80 | 80 |
| Stomach     | Cancer                                 | 2.30E-02 | 1.500  |          |        | Wang (27)         | 12 | 12 |
| Stomach     | Tumor, gastrointestinal stromal (GIST) |          |        | 7.00E-03 | -2.775 | Cho (90)          | 20 | 19 |
| Uterus      | Leiomyoma, uterine corpus              |          |        | 1.70E-02 | -1.146 | Crabtree (77)     | 50 | 27 |
| Uterus      | Leiomyosarcoma, uterine corpus         |          |        | 1.00E-03 | -8.555 | Quade (24)        | 9  | 4  |
| Vulva       | Neoplasia, intraepithelial             | 2.41E-05 | 1.639  | 7.61E-06 | -1.940 | Santegoets (19)   | 9  | 10 |

Shown are all OncoPrint tumor (sub)types with significant results. Subtypes that have significant *ATP13A3* tumor mRNA over-expression and *CAVI1* under-expression, respectively are on a green background. Tumor type and subtype are listed in the first two columns. Columns 3-4 and 5-6 show *P* value and Fold increased/decreased mRNA expression in tumor over (matched) normal tissue, respectively. *P* and Fold values are as determined by a 2log<sub>2</sub>-median centered t-test using OncoPrint default settings. Column 7 shows name, type, and size. Columns 8-9 show amount of tumor samples, and normal tissue samples used in the t-test, respectively. Results in red type are used as the examples in **Figure 9A-D**.

## Biomarkers for polyamine transport in pancreatic cancers

**Table S4.** Complete ATP13A3-CAV1 mRNA expression correlation data used for **Figure 9E, 9F**

| Cancer Type   | ATP-CAV       |                 | Dataset         |            |                             |                   |                 |
|---------------|---------------|-----------------|-----------------|------------|-----------------------------|-------------------|-----------------|
|               | R             | P               | Name            | Size       | Array                       | Study             | PubMed          |
| <b>Breast</b> | <b>-0.202</b> | <b>2.00E-02</b> | <b>Chin</b>     | <b>124</b> | <b>Affymetrix HG U133A</b>  | <b>E-TABM-158</b> | <b>17157792</b> |
| Breast        | -0.179        | 4.40E-03        | Miller          | 251        | Affymetrix HG U133A         | GSE3494           | 16141321        |
| Breast        | -0.193        | 8.00E-06        | TCGA Breast     | 528        | Agilent G4502               | TCGA              | 23000897        |
| Breast        | -0.218        | 3.40E-03        | Wessels         | 178        | Illumina HumanWG-6 v3.0     | GSE34138          | 23203637        |
| Colon         | -0.241        | 1.50E-06        | Domany          | 390        | Affymetrix HG U133A         | GSE41258          | 19359472        |
| Colon         | -0.694        | 3.40E-04        | Hong            | 22         | Affymetrix HG U133P2        | GSE4107           | 17317818        |
| Colon         | -0.251        | 7.80E-03        | Matsuyama       | 111        | Affymetrix HG U133P2        | GSE18105          | 20162577        |
| Colon         | -0.451        | 9.40E-07        | Medema          | 108        | Affymetrix HG U133P2        | GSE33114          | 22056143        |
| Colon         | -0.287        | 9.20E-04        | Olschwang       | 130        | Affymetrix HG U133P2        | GSE37892          | n.y.            |
| Colon         | -0.182        | 1.80E-03        | Sieber          | 290        | Affymetrix HG U133P2        | GSE14333          | 19996206        |
| Colon         | -0.130        | 1.00E-02        | SieberSmith     | 355        | Affymetrix HG U133P2        | *                 | 22115830        |
| Colon         | -0.205        | 1.00E-02        | Skrzypczak      | 145        | Affymetrix HG U133P2        | GSE20916          | 20957034        |
| <b>Colon</b>  | <b>-0.341</b> | <b>2.20E-05</b> | <b>Sugihara</b> | <b>148</b> | <b>Affymetrix HG U133P2</b> | <b>GSE21510</b>   | <b>21270110</b> |
| Colon         | -0.328        | 9.90E-06        | TCGA Colon      | 174        | Agilent G4502               | TCGA              | 22810696        |
| Colon         | -0.296        | 2.00E-02        | Uddin           | 59         | Affymetrix HG U133P2        | GSE23878          | 21281787        |
| Liver         | -0.225        | 4.10E-03        | Cillo           | 161        | Agilent-014850 HG 4x44K     | GSE54236          | 25666192        |
| Lung          | -0.437        | 1.50E-05        | Farez-Vidal     | 91         | Affymetrix HG U133P2        | GSE18842          | 20878980        |
| Lung          | -0.275        | 5.20E-04        | Hou             | 156        | Affymetrix HG U133P2        | GSE19188          | 20421987        |
| Lung          | -0.495        | 1.60E-07        | Muley           | 100        | Affymetrix HG U133P2        | GSE33532          | n.y.            |
| Lung          | -0.176        | 3.60E-04        | Plamadeala      | 410        | Affymetrix HG U133P2        | GSE63074          | n.y.            |
| Ovary         | -0.100        | 2.00E-02        | TCGA Ovary      | 541        | Agilent G4502               | TCGA              | 21720365        |
| Ovary         | -0.225        | 5.00E-02        | Wong            | 77         | Affymetrix HG U133P2        | GSE40595          | 23824740        |
| Prostate      | -0.240        | 2.00E-02        | Ambs            | 89         | Affymetrix HG U133A         | GSE6956           | 18245496        |

<sup>a</sup>Column 1 shows tumor type, columns 2-3 the R and P values of the 2log Pearson correlation tests for ATP13A3 versus CAV1 expression in R2. A negative R value indicates a negative correlation coefficient and a P value < 0.05 is considered statistically significant. Columns 4-8 contain dataset properties: R2 dataset name, amount of samples, array type, study number, and PubMed ID, respectively. GSE, TCGA, or E-TABM indicate NCBI GEO, TCGA, or EBI datasets, respectively n.y. means not yet published. \*indicates GSE14333/17537/17538. Results in red type are used as the examples in **Figure 9E, 9F**.



## Biomarkers for polyamine transport in pancreatic cancers

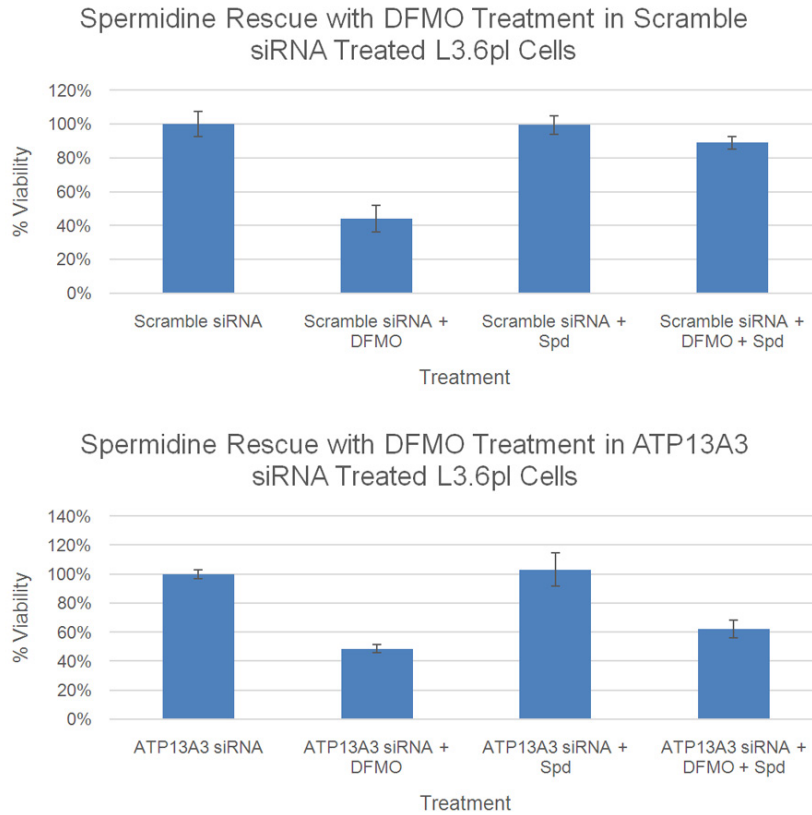

**Figure S1.** siRNA experiments in L3.6pl pancreatic cancer cells with scrambled vs ATP13A3 siRNA showing relative viability changes in the presence of the 48 h  $IC_{50}$  DFMO dose, spermidine (Spd, 1  $\mu$ M) or the combination of DFMO+Spd. Comparison of the rightmost columns (in the top and bottom panels) are consistent with ATP13A3 protein playing a role in the spermidine rescue of DFMO-treated cells.

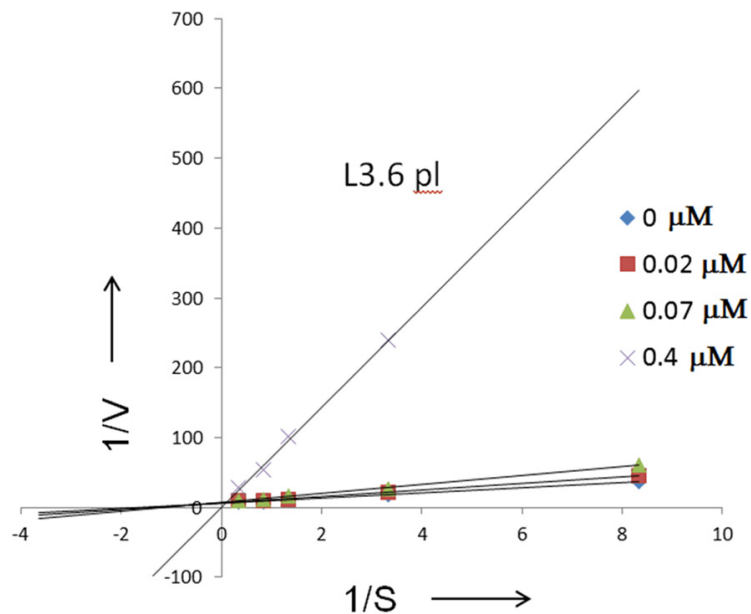

**Figure S2.** Competition experiments with PTI compound **5b** and  $^3$ H-Spd. A classic competitive inhibitor kinetic profile ( $K_i$  of **5b** = 55 nM) was obtained, where the x-intercept changes and the y-intercept remains constant.

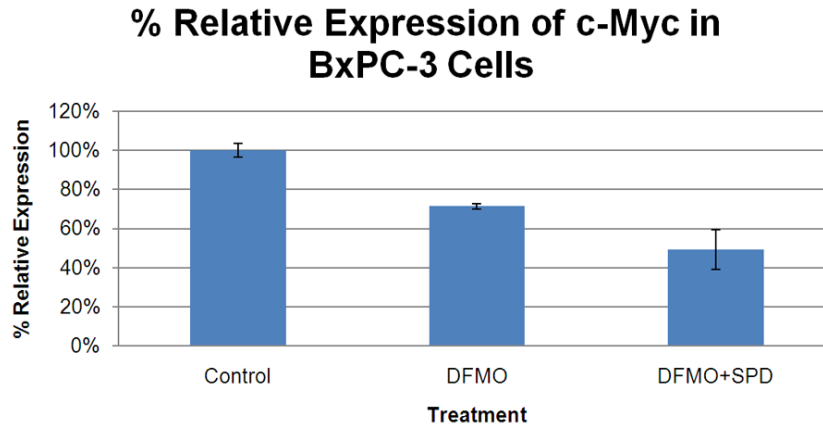

**Figure S3.** Decreased c-Myc protein expression observed in the presence of DFMO (72 h  $IC_{50}$  dose, 14.4 mM) or 72 h  $IC_{50}$  DFMO dose+Spd (1  $\mu$ M) in BxPC-3 cells. Briefly, cells were grown in RPMI 1640 (Gibco), supplemented with 10% fetal bovine serum (Atlanta Biologicals) and penicillin/streptomycin (Gibco). After trypsinization, the cells were allowed 24 hours for reattachment before adding the appropriate drug or vehicle in PBS. DFMO was dosed at the respective  $IC_{50}$  values for each cell line, 14.4 mM (BxPC-3), and spermidine was dosed at 1  $\mu$ M. The cells were incubated for 72 hours with 250  $\mu$ M aminoguanidine present in the media. After 72 hours, the cells were collected and protein extracted in RIPA buffer for quantification via BCA assay and subsequent loading onto an SDS-PAGE gel. The primary antibody against c-Myc was rabbit monoclonal from Abcam, and against  $\beta$ -actin was mouse monoclonal from Sigma-Aldrich. The secondary antibodies used included goat anti-rabbit and goat anti-mouse (for  $\beta$ -actin) antibodies from Santa Cruz Biotechnology.

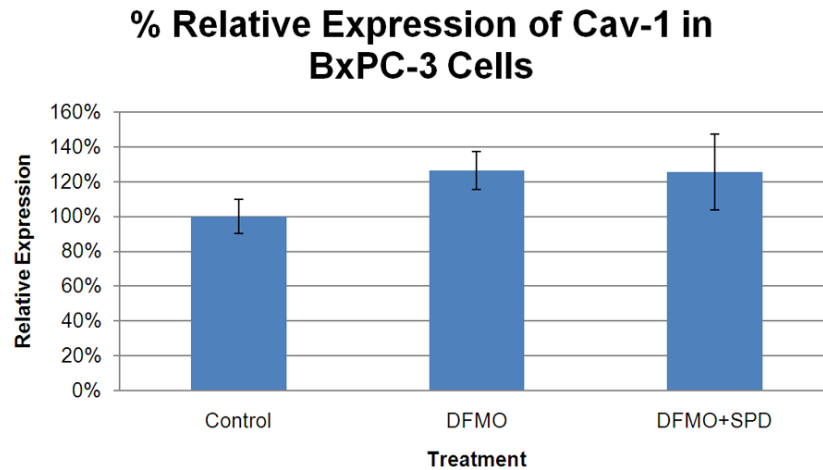

**Figure S4.** Relative expression of Cav-1 in the presence of the 72 h DFMO  $IC_{50}$  dose alone or in combination with Spd (1  $\mu$ M) in BxPC-3 pancreatic cancer cells. The relatively high initial caveolin-1 levels in BxPC-3 cells did not decrease under these conditions and may explain why BxPC-3 cells were not highly rescuable by exogenous Spd, even though BxPC-3 cells had relatively high ATP13A3 expression.
